# Supplementary material for: Casposon integration shows strong target site preference and recapitulates protospacer integration by CRISPR-Cas systems
Source: PubMed Central journal article supplement — Nucleic Acids Res. 2016 Sep 20;44(21):10367–76. doi: 10.1093/nar/gkw821 (PMC5137440; doi:10.1093/nar/gkw821), 2016-09-20
Supplement: supp_gkw821_nar-02037-h-2016-File007.pdf [file supp_gkw821_nar-02037-h-2016-File007.pdf]

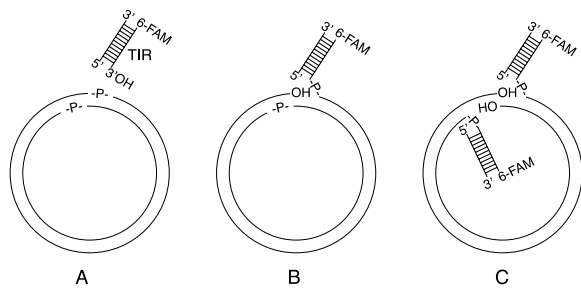

**Figure S1: Single and double integration of a fluorescent oligonucleotide duplex derived from the terminal inverted repeat (TIR) of the *A. boonei* casposon.**

Starting from a covalently closed, circular plasmid (A), integration of the duplex on one strand generates a nicked, relaxed form of the plasmid (B); tandem integration of a second duplex on the other strand generates staggered cuts on both strands and linearizes the plasmid (C).





CCGGGCGGCCCCACTACGAGGAGC---GGGGATATA...ATATCCCC-CCCACTACGAGGAGACACCT  
 CCGGGCGGCCCCACTACGAGGAGT---GGGGATATA...ATATCCCC-CCCACTACGAGGAGACACCT  
 CCGGGCGGCCCCACTACGAGGAGT---GGGGATATA...ATATCCCCACCACTACGAGGAGACACCT  
 CCGGGCGGCCCCACTACGAGGAGT---GGGGATATA...ATATCCCCACCACTACGAGGAGACACCT  
 CCGGGCGGCCCCACTACGAGGAGT---GGGGATATA...ATATCCCCACCACTACGAGGAGACACCT  
 CCGGGCGGCCCCACTACGAGGAGC---GGGGATATA...ATATCCCCACCACTACGAGGAGACACCT  
 CCGGGCGGCCCCACTACGAGGAGT---GGGGATATA...ATATCCCCACCACTACGAGGAGACACCT  
 CCGGGCGGCCCCACTACGAGGAGG---GGGGATATA...ATATCCCCTCCCACTACGAGGAGACACCT  
 CCGGGCGGCCCCACTACGAGGAGT---GGGGATATA...ATATCCCCACCACTACGAGGAGACACCT  
 CCGGGCGGCCCCACTACGAGGAGG---GGGGATATA...ATATCCCCTCCCACTACGAGGAGACACCT  
 CCGGGCGGCCCCACTACGAGGAGT---GGGGATATA...ATATCCCC--CCCACTACGAGGAGACACCT

Non-canonical integration catalyzed by tagged Cas1 into pMA-Target

665 687  
 ACAAGACTGGCCTCATGGGCCTTCCGGGGATA... ATATCCCCGACTGGCCTCATGGGCCTTCCGCT  
222 525  
 GGGCCTCTTCGCTATTACGCCAGTGGGGATATA.....ATATCCCCACCACTACGAGGAGACACCT

**Table S5.** Alignment of the sites bordering the left and right TIR after integration by de-tagged and His-tagged casposase into pMA-ΔTarget of the mini-casposon encoding kanamycin resistance

Numbering of the residues refers to the numbering of the sequence of the recipient plasmid. The distal ends of the inserted casposon are shown in blue; additional nucleotides added by the *E. coli* host upon filling the duplicated single-strand gaps created by the integration are shown in black; duplicated segments, which originate from integration at sites different from the original *A. boonei* target, site are shown in red.

Integrations catalyzed by de-tagged Cas1 into pMA-ΔTarget

513 528  
 GGGCGCTCTCCGCTTCCTCGCTCGGGATATA...ATATCCCCATCCGCTTCCTCGCTCACTGACTCG  
 1261 1275  
 GCTCAGTGGAAAGAACTCACCAGGGATATA...ATATCCCCAGAAAGAACTCACGTTAAGGGAT  
 483 498  
 ACATGGTCATAGCTGTTTCTTGGGGATATA...ATATCCCCACATAGCTGTTTCTTTCGCTATTGGG  
 1243 1260  
 ATCTACGGGTCTGACGCTCAGTGGGGATATA...ATATCCCCGGGTCTGACGCTCAGTGGAACGAAA  
 649 2070  
 CTCCGCCCCCTG...GTTCTTTGGGGATATAT...ATATCCCCACCCCTG...GTTCTTCGGGGCGA  
 1226 1241  
 TAGAAGATCCTTTGATCTTTTCT-GGGGATATA...ATATCCCCCTTTGATCTTTTCTACGGGGTCT  
 289 444  
 ACGACGTTGTAAA...GCTTTCTGGGGATATAT...ATATCCCCAGTTGTAAA...GCTTTCTCAGTC  
 1649 1662  
 TGTGCGCGGAAGCTAGAGTAAAGGGGATATAT...ATATCCCCAGAAGCTAGAGTAAAGTAGTTCGCC  
 2350 2364  
 ATAGGGGTCCGCGCACATTTCTGGGGATATAT...ATATCCCCATCCGCGCACATTTCCCGAAAAG

Integrations catalyzed by tagged Cas1 into pMA-ΔTarget

628 643  
 TTGCTGGCGTTTTTCCATAGGCTGGGGATATA...ATATCCCCGTTTTTCCATAGGCTCCGCCCC  
1772 1776  
 CTCCGGTTCCCAACGATCAAGGGGGATATA...ATATCCCCAGGCGAGTTACATGAT

623 638  
CCGGTTGCTGGCGTTTTTCCATTGGGGATATA...ATATCCCCTACTGGCGTTTTTCCATAGGCTCC

990 1536  
GCCACTGGTAACAG...AGAACTGGGGATATA...ATATCCCAGTAACAG...AGAACCACGCTCAC

2349 2364  
ATAGGGGTTCGCGCACATTTCTGGGGATATA...ATATCCCATTTCGCGCACATTTCCCGAAAAG

1776 1790  
ATCAAGGCAGTTACATGATCTGGGGATATA...ATATCCCAGAGTTACATGATCCCCATGTT

1261 1275  
ACTCAGTGAACGAAAACCTCACTGGGGATATA...ATATCCCAGAACGAAAACCTCACGTTAAGGATT

246 2048  
GTGCTAGGCGATTA...AAGTGTGGGGATATA...ATATCCCAGGCGATTA...AAGTGCTCATCAT
